# Supplementary material for: Deciphering the evolution and metabolism of an anammox bacterium from a community genome
Source: Springer Nature journal article supplement (doi:10.1038/nature04647), 2006-04-01

# Strous et al. SOM Figure 3

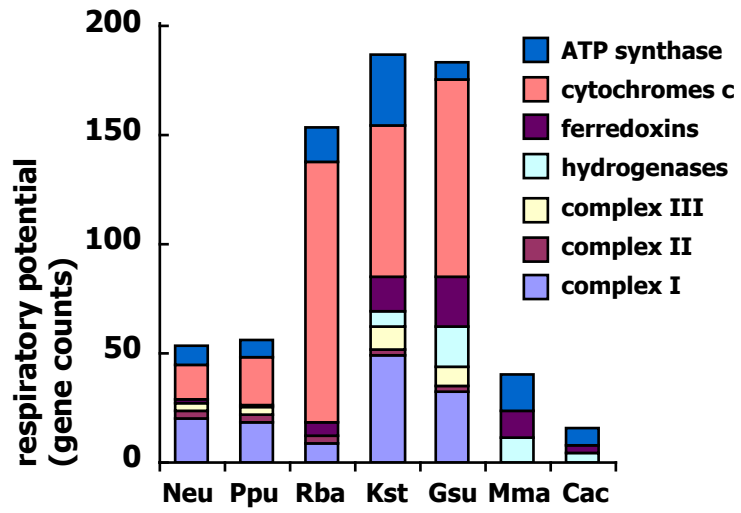

Supplement: 41586_2006_BFnature04647_MOESM5_ESM.pdf [file 41586_2006_BFnature04647_MOESM5_ESM.pdf]
