# Supplementary material for: Deciphering the evolution and metabolism of an anammox bacterium from a community genome
Source: Springer Nature journal article supplement (doi:10.1038/nature04647), 2006-04-01

FITCH

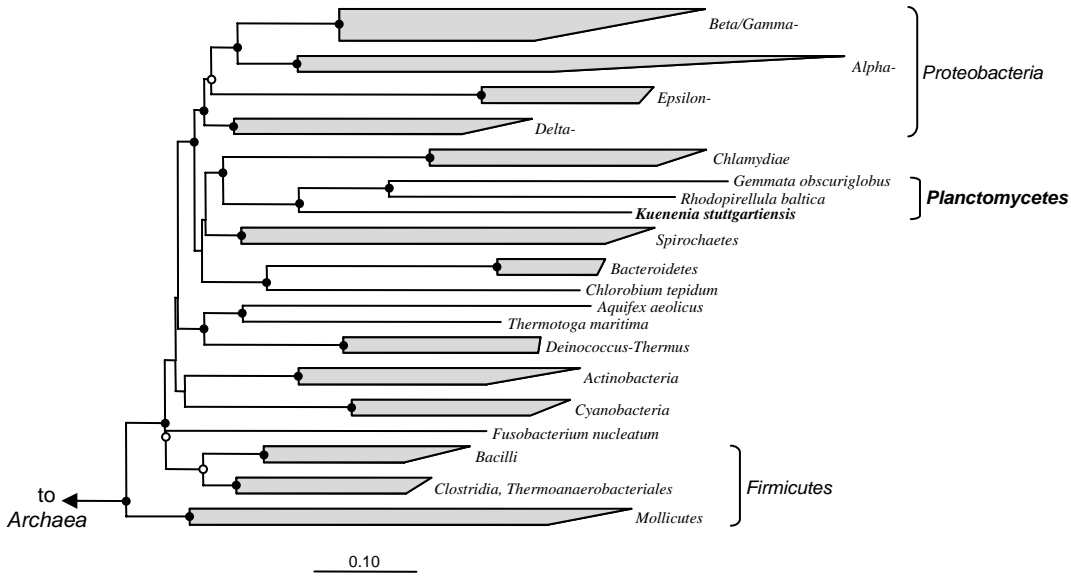

MP

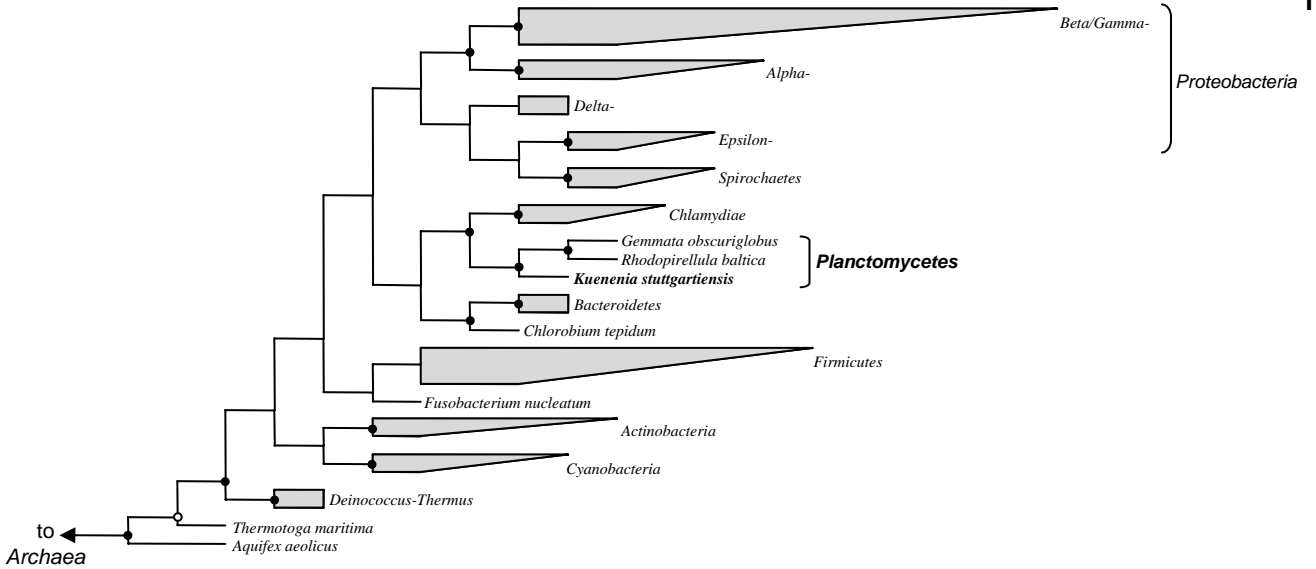

ML

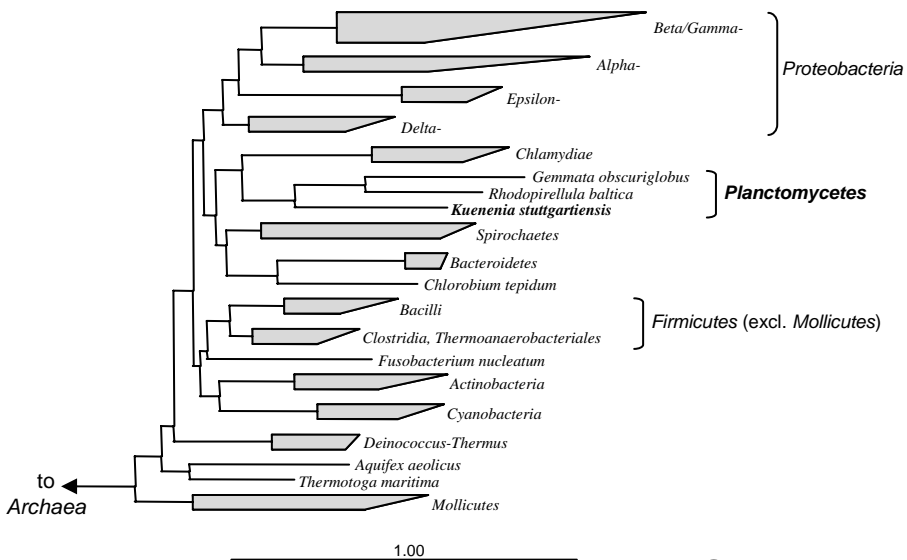

Supplement: 41586_2006_BFnature04647_MOESM7_ESM.pdf [file 41586_2006_BFnature04647_MOESM7_ESM.pdf]
