# Supplementary material for: Deciphering the evolution and metabolism of an anammox bacterium from a community genome
Source: Springer Nature journal article supplement (doi:10.1038/nature04647), 2006-04-01
Supplement: 41586_2006_BFnature04647_MOESM8_ESM.pdf [file 41586_2006_BFnature04647_MOESM8_ESM.pdf]

**SOM Table 1. General features of the *Kuenenia stuttgartiensis* genome and comparison with *Rhodopirellula baltica*<sup>23</sup>**

|                                          | <i>K. stuttgartiensis</i> | <i>R. baltica</i>     |
|------------------------------------------|---------------------------|-----------------------|
| Total size, bases                        | 4,218,325                 | 7,145,576             |
| G+C content, %                           | 41                        | 55.4                  |
| Coding sequences                         | 4,664                     | 7,325                 |
| Coding density, %                        | 85.9                      | 95                    |
| Average gene length, bases               | 776                       | 939                   |
| Genes with similarities in databases*    | 3,279 (70.3%)             | 4,613 (63%)           |
| Genes with functional assignments**      | 1,385 (29.7%)             | 2,712 (37%)           |
| rRNAs                                    | 1x 16S-23S-5S             | 1x (16S) and (23S-5S) |
| tRNAs                                    | 44                        | 70                    |
| <i>Archaea</i> -like coding sequences*** | 6.9%                      | 9%                    |
| <i>Eukarya</i> -like coding sequences*** | 3.7%                      | 8%                    |

\* Threshold for BLASTP E-value <  $1 \times 10^{-3}$  (includes hits to hypothetical proteins). Value was recalculated for *R. baltica* by taking into account genomes published since the *R. baltica* genome was published.

\*\* Value was recalculated for *R. baltica* by taking into account genomes published since the *R. baltica* genome was published.

\*\*\* Coding sequences with a first BLASTP hit with an E-value <  $1 \times 10^{-3}$  with proteins from *Archaea* and *Eukarya*, respectively.
