# Supplementary material for: Deciphering the evolution and metabolism of an anammox bacterium from a community genome
Source: Springer Nature journal article supplement (doi:10.1038/nature04647), 2006-04-01
Supplement: 41586_2006_BFnature04647_MOESM9_ESM.pdf [file 41586_2006_BFnature04647_MOESM9_ESM.pdf]

SOM Table 2. Genes with known homologues involved in respiration

| <b>atp<sup>1</sup> ATP synthase and pyrophosphatase</b>                                  |                                                                |                                                          |                                                               |                                                                                 |                                                                          |
|------------------------------------------------------------------------------------------|----------------------------------------------------------------|----------------------------------------------------------|---------------------------------------------------------------|---------------------------------------------------------------------------------|--------------------------------------------------------------------------|
|                                                                                          | <b>enzyme</b>                                                  | <b>orf</b>                                               | <b>corresponding gene with validated product</b>              | <b>best blast hit in KEGG "genes" database</b>                                  |                                                                          |
| atpB                                                                                     | ATP synthase, F0F1-type                                        | kuste3789                                                | <i>Escherichia coli</i> (b3738:271/257 66-256 (27%))          | <i>Parachlamydia_sp_UWE25</i> (pcu:pc1674:271/257 15-255 (39%))                 |                                                                          |
| atpE                                                                                     |                                                                | kuste3790                                                | <i>Streptococcus pneumoniae</i> (Z26850:66/108 14-71 (34%))   | <i>Parachlamydia_sp_UWE25</i> (pcu:pc1673:98/108 1-75 (40%))                    |                                                                          |
| atpE                                                                                     |                                                                | kuste3791                                                | <i>Streptococcus pneumoniae</i> (Z26851:66/90 20-71 (40%))    | <i>Geobacter_sulfurreducens</i> (gsu:GSU0333:91/90 3-90 (42%))                  |                                                                          |
| atpA                                                                                     |                                                                | kuste3793                                                | <i>Synechococcus sp.</i> (X70431:503/504 7-500 (61%))         | <i>Clostridium_perfringens</i> (cpe:CPE2189:502/504 1-500 (67%))                |                                                                          |
| atpG                                                                                     |                                                                | kuste3794                                                | <i>Escherichia coli</i> (b3733:287/290 1-289 (31%))           | <i>Legionella_pneumophila_Paris</i> (lpp:ipp3054:288/290 1-289 (35%))           |                                                                          |
| atpD                                                                                     |                                                                | kuste3795                                                | <i>Synechococcus sp.</i> (X70432:482/471 24-469 (66%))        | <i>Thermoanaerobacter_tengcongensis</i> (tte:TTE0637:461/471 10-469 (74%))      |                                                                          |
| atpC                                                                                     |                                                                | kuste3796                                                | <i>Escherichia coli</i> (b3731:139/134 1-126 (27%))           | <i>Thermoanaerobacter_tengcongensis</i> (tte:TTE0638:138/134 1-134 (35%))       |                                                                          |
| atpD                                                                                     | ATP synthase, F0F1-type                                        | kuste4592                                                | <i>Synechococcus sp.</i> (X70432:482/462 8-460 (47%))         | <i>Methanosarcina_acetivorans</i> (mac:MA2441:484/462 8-459 (68%))              |                                                                          |
| atpE                                                                                     |                                                                | kuste4593                                                | <i>Escherichia coli</i> (b3731:139/130 17-100 (30%))          | <i>Chlorobium_tepidum_TLS</i> (cte:CT1032:129/130 1-124 (46%))                  |                                                                          |
|                                                                                          | hypothetical protein<br>hypothetical protein                   | kuste4594                                                |                                                               | <i>Chlorobium_tepidum</i> (cte:CT1031 111/107 27-110 (54%))                     |                                                                          |
|                                                                                          |                                                                | kuste4595                                                |                                                               | <i>Methanosarcina_barkeri</i> (mba:Mbar_A3103:101/104 2-97 (39%))               |                                                                          |
| atpB                                                                                     |                                                                | kuste4596                                                | <i>Streptococcus pneumoniae</i> (Z26851:238/236 10-223 (26%)) | <i>Rhodopirellula_baltica</i> (rba:RB4911:228/236 1-220 (59%))                  |                                                                          |
| atpE                                                                                     |                                                                | kuste4597                                                |                                                               | <i>Rhodopirellula_baltica</i> (rba:RB4913: 93/109 1-84 (72%))                   |                                                                          |
| atpF                                                                                     |                                                                | kuste4598                                                | <i>Proteus vulgaris</i> (AJ002737:917/255 41-113 (27%))       | <i>Methanosarcina_acetivorans</i> (mac:MA2435:329/255 1-252 (32%))              |                                                                          |
| atpA                                                                                     |                                                                | kuste4599                                                | <i>Synechococcus sp.</i> (X70431:503/513 23-512 (45%))        | <i>Methanosarcina_acetivorans</i> (mac:MA2434:533/513 15-506 (61%))             |                                                                          |
| atpG                                                                                     |                                                                | kuste4600                                                | <i>Escherichia coli</i> (b3733:287/299 1-292 (27%))           | <i>Rhodopirellula_baltica</i> (rba:RB4917:306/299 1-295 (45%))                  |                                                                          |
| atpG                                                                                     | ATP synthase, F0F1-type                                        | kustc0579                                                | <i>Escherichia coli</i> (b3733:287/279 1-272 (21%))           | <i>Methylococcus_capsulatus_Bath</i> (mca:MCA2708:275/279 17-272 (26%))         |                                                                          |
| atpA                                                                                     |                                                                | kustc0578                                                | <i>Synechococcus sp.</i> (X70431:503/498 12-455 (48%))        | <i>Thermoanaerobacter_tengcongensis</i> (tte:TTE0635:506/498 12-497 (50%))      |                                                                          |
| atpH                                                                                     |                                                                | kustc0577                                                | <i>Escherichia coli</i> (b3735:177/246 171-243 (31%))         | <i>Methylococcus_capsulatus_Bath</i> (mca:MCA2701:253/246 1-239 (25%))          |                                                                          |
| atpC                                                                                     |                                                                | kustc0576                                                | <i>Escherichia coli</i> (b3737:79/88 13-79 (31%))             | <i>Legionella_pneumophila_Paris</i> (lpp:ipp2332:91/88 11-87 (57%))             |                                                                          |
| atpB                                                                                     |                                                                | kustc0575                                                | <i>Escherichia coli</i> (b3738:271/221 29-214 (27%))          | <i>Legionella_pneumophila_Philadelphia_1</i> (lpn:lpg1051:230/221 12-218 (49%)) |                                                                          |
| "atpI"                                                                                   |                                                                | kustc0574                                                |                                                               | <i>Legionella_pneumophila_Philadelphia_1</i> (lpn:lpg1052: 92/92 3-85 (39%))    |                                                                          |
| atpE                                                                                     |                                                                | kustc0573                                                | <i>Escherichia coli</i> (b3731:139/134 5-92 (24%))            | <i>Gluconobacter_oxydans_621H</i> (gox:GOX2168:138/134 7-105 (32%))             |                                                                          |
| atpD                                                                                     |                                                                | kustc0572                                                | <i>Synechococcus sp.</i> (X70432:482/454 3-454 (47%))         | <i>Thermotoga_maritima</i> (tma:TM1610:468/454 2-454 (56%))                     |                                                                          |
| VatpE                                                                                    |                                                                | Vacuolar ATPase (proton pumping)<br>hypothetical protein | kuste3864                                                     | <i>Borrelia_burgdorferi</i> (BB0096:200/210 1-199 (27%))                        | <i>Treponema_denticola_ATCC_35405</i> (tde:TDE1381:205/210 1-206 (29%))  |
|                                                                                          |                                                                |                                                          | kuste3865                                                     |                                                                                 | <i>Treponema_denticola_ATCC_35405</i> (tde:TDE1380:180/183 2-163 (31%))  |
| VatpA                                                                                    |                                                                |                                                          | kuste3866                                                     | <i>Borrelia_burgdorferi</i> (BB0094:551/589 37-580 (56%))                       | <i>Treponema_denticola_ATCC_35405</i> (tde:TDE1683:589/589 16-578 (63%)) |
| VatpB                                                                                    |                                                                |                                                          | kuste3867                                                     | <i>Borrelia_burgdorferi</i> (BB0093:434/437 1-429 (72%))                        | <i>Treponema_denticola_ATCC_35405</i> (tde:TDE1682:431/437 1-430 (71%))  |
| VatpD                                                                                    |                                                                |                                                          | kuste3869                                                     | <i>Borrelia_burgdorferi</i> (BB0092:204/202 1-182 (48%))                        | <i>Borrelia_burgdorferi</i> (bbu:BB0092:204/202 1-192 (50%))             |
| VatpI                                                                                    |                                                                |                                                          | kuste3870                                                     | <i>Borrelia_burgdorferi</i> (BB0091:608/583 1-582 (28%))                        | <i>Treponema_pallidum</i> (tpa:TP0429:622/583 1-580 (29%))               |
| VatpK                                                                                    |                                                                |                                                          | kuste3871                                                     | <i>Borrelia_burgdorferi</i> (BB0090:144/152 9-147 (43%))                        | <i>Borrelia_garini</i> (bga:BG0091:144/152 9-147 (55%))                  |
|                                                                                          | pyrophosphate-energized vacuolar membrane<br>proton pump; ppmp | kustd1836                                                | <i>Methanosarcina_mazei</i> (M0700:676/800 80-783 (45%))      | <i>Bacteroides_thetaiotaomicron_VPI-5482</i> (bth:BT3411:734/800 80-790 (61%))  |                                                                          |
| <b>Ni-Fe Hydrogen evolving hydrogenase</b>                                               |                                                                |                                                          |                                                               |                                                                                 |                                                                          |
|                                                                                          | <b>enzyme</b>                                                  | <b>orf</b>                                               | <b>corresponding gene with validated product</b>              | <b>best blast hit in KEGG "genes" database</b>                                  |                                                                          |
|                                                                                          | hydrogenase 4, subunit D                                       | kustd1773                                                | <i>Escherichia coli</i> (b2482:672/678 2-676 (32%))           | <i>Thermoanaerobacter_tengcongensis</i> (tte:TTE1706:673/678 3-677 (40%))       |                                                                          |
|                                                                                          | hydrogenase 4, subunit C                                       | kustd1775                                                | <i>Escherichia coli</i> (b2722:307/312 18-307 (33%))          | <i>Methylococcus_capsulatus_Bath</i> (mca:MCA1141:312/312 6-311 (48%))          |                                                                          |
|                                                                                          | hydrogenase 4, subunit E                                       | kustd1776                                                | <i>Escherichia coli</i> (b2485:216/221 6-220 (19%))           | <i>Azoarcus_sp_EbN1</i> (eba:ebA4191:219/221 9-221 (34%))                       |                                                                          |
|                                                                                          | hydrogenase 4, subunit D                                       | kustd1777                                                | <i>Escherichia coli</i> (b2486:526/491 10-488 (39%))          | <i>Thermoanaerobacter_tengcongensis</i> (tte:TTE1702:494/491 1-488 (42%))       |                                                                          |
|                                                                                          | hydrogenase 4, subunit G                                       | kustd1778                                                | <i>Escherichia coli</i> (b2721:569/531 7-530 (35%))           | <i>Thermoanaerobacter_tengcongensis</i> (tte:TTE1700:576/531 56-530 (42%))      |                                                                          |
|                                                                                          | hydrogenase 4, subunit I                                       | kustd1779                                                | <i>Escherichia coli</i> (b2719:255/262 123-257 (50%))         | <i>Desulfotalea_psychrophila_LSV54</i> (dps:DP1042:248/262 1-254 (38%))         |                                                                          |
| <b>nuo<sup>1</sup> Complex I (proton and sodium pumping NADH::quinon oxidoreductase)</b> |                                                                |                                                          |                                                               |                                                                                 |                                                                          |
|                                                                                          | <b>enzyme</b>                                                  | <b>orf</b>                                               | <b>corresponding gene with validated product</b>              | <b>best blast hit in KEGG "genes" database</b>                                  |                                                                          |
| nuoA                                                                                     | NADH::quinone oxidoreductase (complex I)*                      | kuste2660                                                | <i>Escherichia coli</i> (b2288:147/138 32-124 (46%))          | <i>Methylococcus_capsulatus_Bath</i> (mca:MCA1359:139/138 10-132 (54%))         |                                                                          |
| nuoB                                                                                     |                                                                | kuste2661                                                | <i>Escherichia coli</i> (b2287:220/212 18-212 (61%))          | <i>Methylococcus_capsulatus_Bath</i> (mca:MCA1358:213/212 1-209 (61%))          |                                                                          |
| nuoCD                                                                                    |                                                                | kuste2662                                                | <i>Escherichia coli</i> (b2286:600/581 3-581 (59%))           | <i>Methylococcus_capsulatus_Bath</i> (mca:MCA1357:587/581 6-581 (65%))          |                                                                          |
| nuoE                                                                                     |                                                                | kuste2663                                                | <i>Escherichia coli</i> (b2285:166/154 2-153 (49%))           | <i>Pseudomonas_aeruginosa</i> (pae:PA2640:166/154 1-153 (50%))                  |                                                                          |
| nuoF                                                                                     |                                                                | kuste2664                                                | <i>Escherichia coli</i> (b2284:445/427 7-421 (55%))           | <i>Methylococcus_capsulatus_Bath</i> (mca:MCA1355:427/427 4-419 (67%))          |                                                                          |
| nuoG                                                                                     |                                                                | kuste2665                                                | <i>Escherichia coli</i> (b2283:910/904 1-888 (45%))           | <i>Pseudomonas_aeruginosa</i> (pae:PA2642:905/904 1-888 (50%))                  |                                                                          |
| nuoH                                                                                     |                                                                | kuste2666                                                | <i>Escherichia coli</i> (b2282:325/318 4-316 (59%))           | <i>Methylococcus_capsulatus_Bath</i> (mca:MCA1353:316/318 11-317 (69%))         |                                                                          |
| nuoL                                                                                     |                                                                | kuste2667                                                | <i>Escherichia coli</i> (b2281:180/171 3-171 (68%))           | <i>Methylococcus_capsulatus_Bath</i> (mca:MCA1352:171/171 1-171 (68%))          |                                                                          |
| nuoJ                                                                                     |                                                                | kuste2668                                                | <i>Escherichia coli</i> (b2280:184/189 6-168 (38%))           | <i>Shigella_flexneri_2a</i> (sf:S2491:184/189 6-168 (53%))                      |                                                                          |
| nuoK                                                                                     |                                                                | kuste2669                                                | <i>Escherichia coli</i> (b2279:100/102 26-102 (48%))          | <i>Methylococcus_capsulatus_Bath</i> (mca:MCA1350:102/102 1-102 (64%))          |                                                                          |
| nuoL                                                                                     |                                                                | kuste2670                                                | <i>Escherichia coli</i> (b2278:613/626 32-626 (44%))          | <i>Methylococcus_capsulatus_Bath</i> (mca:MCA1349:613/626 1-624 (53%))          |                                                                          |

|      |                                                |           |                                                              |                                                                 |
|------|------------------------------------------------|-----------|--------------------------------------------------------------|-----------------------------------------------------------------|
| nuoM |                                                | kuste2671 | Escherichia coli (b2277:509/545 60-498 (49%))                | Methylococcus_capsulatus_Bath (mca:MCA1348:489/545 1-487 (57%)) |
| nuoN |                                                | kuste2672 | Escherichia coli (b2276:425/485 61-474 (44%))                | Pseudomonas_aeruginosa (pae:PA2649:486/485 6-474 (44%))         |
| nqrA | Na+ translocating NADH::quinone oxidoreductase | kuste3325 | Methanothermobacter wolfeii (AJ009688:349/348 278-328 (33%)) | Hemophilus influenzae (hin:HI1685:819/348 46-342 (25%))         |
| nqrB |                                                | kuste3326 | Vibrio alginolyticus (AB008030:414/367 113-353 (30%))        | Thermotoga_maritima (tma:TM0245:318/367 55-352 (36%))           |
| nqrC |                                                | kuste3327 | Vibrio alginolyticus (AB008030:256/227 123-219 (33%))        | Clostridium_tetani_E88 (ctc:CTC00675:339/227 51-221 (24%))      |
| nqrD |                                                | kuste3328 | Vibrio alginolyticus (AB008030:198/472 271-195 (24%))        | Shewanella_oneidensis (son:SO0906:202/472 271-195 (26%))        |
| nqrE |                                                | kuste3329 | Vibrio alginolyticus (AB008030:407/545 38-464 (24%))         | Hemophilus influenzae (hin:HI0171:411/545 1-464 (26%))          |
| nqrE | Na+ translocating NADH::quinone oxidoreductase | kustc0732 | Vibrio alginolyticus (AB008030:198/212 20-210 (42%))         | Fusobacterium_nucleatum (fnu:FN1592:194/212 8-210 (55%))        |
| nqrD |                                                | kustc0731 | Vibrio alginolyticus (AB008030:210/210 17-188 (43%))         | Clostridium_tetani_E88 (ctc:CTC01022:200/210 12-202 (55%))      |

\* see also the putative formate::quinone oxidoreductase listed in the acetyl CoA pathway

### Q<sup>1</sup> ubiquinone biosynthesis\*

| enzyme | orf                                                                                                      | corresponding gene with validated product               | best blast hit in KEGG "genes" database                                       |
|--------|----------------------------------------------------------------------------------------------------------|---------------------------------------------------------|-------------------------------------------------------------------------------|
| ubiA   | 4-hydroxybenzoate-octaprenyltransferase                                                                  | kustd1781 Escherichia coli (b4040:290/288 1-283 (22%))  | Geobacter_sulfurreducens (gsu:GSU0439:298/288 7-288 (42%))                    |
| ubiB   | 2-octaprenylphenol hydroxylase of ubiquinone biosynthetic pathway                                        | kuste4161 Escherichia coli (b3835:546/562 65-479 (31%)) | Geobacter_sulfurreducens (gsu:GSU1088:561/562 1-562 (38%))                    |
| ubiC   | chorismate lyase                                                                                         |                                                         |                                                                               |
| ubiD   | 3-octaprenyl-4-hydroxybenzoate decarboxylase                                                             | kuste3161 Escherichia coli (b3843:497/589 1-585 (33%))  | Archaeoglobus_fulgidus (afu:AF0209:481/589 1-585 (25%))                       |
| ubiE   | ubiquinone/menaquinone biosynthesis methyltransferase                                                    | kuste3889 Escherichia coli (b3833:251/242 10-241 (33%)) | Rhodopirellula_baltica (rba:RB2752:317/242 5-242 (44%))                       |
| ubiF   | 2-octoprenyl-3-methyl-6-methoxy-1,4-benzoquinone hydroxylase                                             |                                                         |                                                                               |
| ubiG   | 3-demethylubiquinone-9 3-methyltransferase and 2-octaprenyl-6-hydroxy phenol methylase                   | kuste3239 Escherichia coli (b2232:240/264 54-152 (28%)) | Bacillus cereus (bce:BC2100:226/264 2-202 (24%))                              |
| ubiG   | 3-demethylubiquinone-9 3-methyltransferase and 2-octaprenyl-6-methoxyphenol hydroxylase, FAD/NAD-binding | kuste3338 Escherichia coli (b2232:240/282 89-176 (35%)) | Leptospira_interrogans_serovar_Copenhageni (lic:LIC10073:283/282 8-225 (28%)) |
| ubiH   |                                                                                                          |                                                         |                                                                               |

\* menaquinone biosynthesis was absent

### bc1<sup>1</sup> complex III (bc1, quinol::cytochrome c oxidoreductase)

| enzyme                                                            | orf       | corresponding gene with validated product                | best blast hit in KEGG "genes" database                                  |
|-------------------------------------------------------------------|-----------|----------------------------------------------------------|--------------------------------------------------------------------------|
| rieske iron-sulfur [2Fe-2S] protein                               | kuste4569 | Bacillus subtilis (L47709:167/173 23-148 (34%))          | Symbiobacterium_thermophilum_IAM14863 (sth:STH3146: 34%)                 |
| hypothetical iron sulfur protein                                  | kuste4570 | Moorella thermoacetica (AAB18329:707/581 26-495 (41%))   | Thermococcus_kodakaraensis_KOD1 (tko:TK1612: 42%)                        |
| cytochrome b6 of bc1 complex                                      | kuste4571 | Bacillus subtilis (L47709:224/256 37-256 (34%))          | Symbiobacterium_thermophilum_IAM14863 (sth:STH3148:258/256 16-256 (52%)) |
| cytochrome b                                                      | kuste4572 | Bacillus subtilis (L47709:255/240 21-78 (31%))           | Symbiobacterium_thermophilum_IAM14863 (sth:STH3147: 39%)                 |
| hypothetical (hexaheme) cytochrome c hydroxylamine oxidoreductase | kuste4573 |                                                          | Desulfovibrio_vulgaris_Hildenborough (dvo:DVU0922: 32%)                  |
| rieske iron-sulfur [2Fe-2S] protein                               | kuste4574 | Nitrosomonas europaea (U04053:570/584 6-508 (29%))       | Silicibacter_pomeroyi_DSS-3 (sil:SPOA0201: 30%)                          |
| cytochrome b6 of bc1 complex                                      | kustd1480 | Bacillus subtilis (L47709:167/168 12-140 (26%))          | Symbiobacterium_thermophilum_IAM14863 (sth:STH3146:178/168 71-147 (41%)) |
| hypothetical protein                                              | kustd1481 | Synechococcus sp. PCC 7002 (X63049:222/275 73-275 (35%)) | Symbiobacterium_thermophilum_IAM14863 (sth:STH3148:258/275 35-275 (54%)) |
| hypothetical iron sulfur protein                                  | kustd1482 |                                                          | Mycobacterium_avium_paratuberculosis (mpa:MAP2250c:731/51 5-47 (29%))    |
| cytochrome b6 of bc1 complex                                      | kustd1483 | Moorella thermoacetica (AAB18329:707/566 19-482 (40%))   | Thermococcus_kodakaraensis_KOD1 (tko:TK1612:952/566 19-549 (40%))        |
| hypothetical (octa heme) cytochrome c                             | kustd1484 | Bacillus subtilis (L47709:255/277 13-123 (28%))          | Symbiobacterium_thermophilum_IAM14863 (sth:STH3147:253/277 35-179 (25%)) |
| rieske iron-sulfur [2Fe-2S] protein                               | kustd1485 | Bacillus firmus (M94110:342/948 331-407 (33%))           | Rhodopirellula_baltica (rba:RB3953:857/948 435-393 (33%))                |
| extended cytochrome bc of bc1 complex                             | kuste3096 | Bacillus subtilis (L47709:167/162 4-139 (28%))           | Oceanobacillus_ihayensis (oih:OB1776:170/162 4-156 (32%))                |
|                                                                   | kuste3097 | Bacillus subtilis (L47709:224/630 1-213 (37%))           | Chlorobium_tepidum_TLS (cte:CT0303:428/630 26-359 (36%))                 |

### cbb3 type terminal oxidase

| enzyme                                              | orf       | corresponding gene with validated product              | best blast hit in KEGG "genes" database                      |
|-----------------------------------------------------|-----------|--------------------------------------------------------|--------------------------------------------------------------|
| cytochrome c oxidase, cbb3 type, maturation protein | kustc0430 | Pseudomonas putida (PP4262:71/50 1-45 (55%))           | Pseudomonas_aeruginosa (pae:PA1548:69/50 1-49 (51%))         |
| cytochrome c oxidase, cbb3-type, subunit I          | kustc0429 | Rhodobacter capsulatus (X80134:532/710 15-470 (49%))   | Bdellovibrio_bacteriovorus (bba:Bd2611:706/710 13-708 (66%)) |
| hypothetical protein                                | kustc0428 |                                                        | Bdellovibrio_bacteriovorus (bba:Bd2612:54/56 1-54 (42%))     |
| cytochrome c oxidase, cbb3-type, subunit ccoP       | kustc0427 | Rhodobacter capsulatus (X80134:297/193 3-177 (36%))    | Bdellovibrio_bacteriovorus (bba:Bd2613:185/193 16-192 (38%)) |
| hypothetical ferredoxin                             | kustc0426 | Rhizobium leguminosarum (AJ001522:522/466 8-304 (35%)) | Bdellovibrio_bacteriovorus (bba:Bd2614:468/466 18-464 (43%)) |
| hypothetical protein                                | kustc0425 |                                                        | Bdellovibrio_bacteriovorus (bba:Bd2615:213/235 15-222 (34%)) |

### nir<sup>1</sup> nitrite reductase (NirS)\*

| enzyme | orf | corresponding gene with validated product | best blast hit in KEGG "genes" database |
|--------|-----|-------------------------------------------|-----------------------------------------|
|--------|-----|-------------------------------------------|-----------------------------------------|

|                                         |           |                                                         |                                                                 |
|-----------------------------------------|-----------|---------------------------------------------------------|-----------------------------------------------------------------|
| cytochrome cd1 nitrite reductase; nirS  | kuste4136 | Paracoccus pantotrophus (AJ401462:596/621 69-621 (49%)) | Dechloromonas aromatica (dar:Daro_3323:576/621 73-621 (50%))    |
| hypothetical protein                    | kuste4137 | Pseudomonas aeruginosa (PA1983:145/160 23-148 (22%))    | Xanthomonas campestris_8004 (xcb:XC_2295:683/160 42-154 (29%))  |
| heme d1 biosynthesis protein NirN; nirN | kuste4138 | Azoarcus sp. (ebA876:534/569 40-480 (33%))              | Silicibacter pomeroyi_DSS-3 (sil:SPOA0228:503/569 28-477 (33%)) |
| heme d1 biosynthesis protein NirJ; nirJ | kuste4139 | Pseudomonas aeruginosa (PA0511:387/362 1-362 (40%))     | Azoarcus_sp_EbN1 (eba:ebA877:401/362 1-362 (43%))               |
| heme d1 biosynthesis protein NirF; nirF | kuste4140 | Pseudomonas aeruginosa (PA0516:392/387 75-381 (30%))    | Pseudomonas aeruginosa (pae:PA0516:392/387 75-381 (30%))        |

\* additional maturation proteins (NirD, NirE) present outside operon

### hao<sup>1</sup> hydroxylamine oxidoreductase\*

| enzyme | orf                          | corresponding gene with validated product                      | best blast hit in KEGG "genes" database                           |
|--------|------------------------------|----------------------------------------------------------------|-------------------------------------------------------------------|
| hao    | hydroxylamine oxidoreductase | kuste2435 Nitrosomonas europaea (U04053:570/499 32-309 (25%))  | Nitrosomonas_europaea (neu:NE2339:570/499 32-309 (25%))           |
| hao    |                              | kuste2457 Nitrosomonas europaea (U04053:570/433 81-426 (22%))  | Silicibacter_pomeroyi_DSS-3 (sil:SPOA0201:528/433 25-429 (22%))   |
| hao    |                              | kustd1340 Nitrosomonas europaea (U04053:570/577 71-493 (26%))  | Methylococcus_capsulatus_Bath (mca:MCA0956:559/577 54-465 (30%))  |
| hao    |                              | kustd2021 Nitrosomonas europaea (U04053:570/554 57-333 (25%))  | Nitrosomonas_europaea (neu:NE2044:570/554 57-333 (25%))           |
| hao    |                              | kusta0043 Nitrosomonas europaea (U04053:570/591 159-547 (27%)) | Methylococcus_capsulatus_Bath (mca:MCA0956:559/591 158-519 (30%)) |
| hao    |                              | kustc1061 Nitrosomonas europaea (U04053:570/536 21-483 (29%))  | Nitrosomonas_europaea (neu:NE2339:570/536 21-483 (29%))           |
| hao    |                              | kustc0694 Nitrosomonas europaea (U04053:570/656 145-567 (26%)) | Methylococcus_capsulatus_Bath (mca:MCA0956:559/656 128-539 (30%)) |
| hao    |                              | kustc0458 Nitrosomonas europaea (U04053:570/554 52-554 (29%))  | Methylococcus_capsulatus_Bath (mca:MCA0956:559/554 74-547 (31%))  |

\* Two additional copies part of bc1 complex and unknown complex 2 (see SOM Figure 2)

### nar/ret<sup>1</sup> nitrate reductase (NarG)

| enzyme                                    | orf       | corresponding gene with validated product                  | best blast hit in KEGG "genes" database                                         |
|-------------------------------------------|-----------|------------------------------------------------------------|---------------------------------------------------------------------------------|
| hypothetical protein                      | kustd1699 |                                                            | Xanthomonas_axonopodis (xac:XAC2712:227/263 117-239 (38%))                      |
| nitrate reductase, subunit alpha; narG    | kustd1700 | Escherichia coli (b1468:1246/1148 44-879 (33%))            | Archaeoglobus_fulgidus (afu:AF0176:896/1148 61-859 (26%))                       |
| hypothetical protein                      | kustd1701 | Mycoplasma_pulmonis (AL445564:314/322 153-224 (26%))       | Acinetobacter_sp_AD1 (aci:ACIAD3534:185/322 220-300 (30%))                      |
| nitrate reductase chaperone narJ          | kustd1702 | Halobacterium_marismortui (rrnAC1204:226/269 26-237 (24%)) | Chlorobium_tepidum_TLS (cte:CT0493:187/269 25-223 (26%))                        |
| nitrate reductase, FeS subunit; narH      | kustd1703 | Escherichia coli (b1467:514/410 23-343 (30%))              | Haloarcula_marismortui_ATCC_43049 (hma:rrnAC1200:358/410 24-329 (43%))          |
| nitrate reductase subunit; narM           | kustd1704 | Pyrobaculum_aerophilum (PAE3613:307/322 42-318 (25%))      | Azoarcus_sp_EbN1 (eba:c1A62:214/322 45-308 (24%))                               |
| hypothetical monoheme cytochrome c        | kustd1705 |                                                            | Plasmodium_falciparum (pfa:PF14_0770:344/182 29-163 (24%))                      |
| universal stress protein UspA             | kustd1706 | Plectonema_boryanum (D78208:508/434 376-422 (34%))         | Methanosarcina_mazei (mma:MM1452:323/434 3-160 (29%))                           |
| conserved hypothetical (monoheme) protein | kustd1707 |                                                            | Nitrosomonas_europaea (neu:NE0925:131/188 44-129 (34%))                         |
| hypothetical (tetraheme) protein          | kustd1708 | Pseudomonas_stutzeri (Z28384:146/500 303-490 (26%))        | Bdellovibrio_bacteriovorus (bba:Bd2601:215/500 328-490 (28%))                   |
| hypothetical (diheme) protein             | kustd1709 | Pyrobaculum_aerophilum (PAE3613:307/535 284-500 (30%))     | Pyrobaculum_aerophilum (pai:PAE3613:307/535 271-500 (31%))                      |
| hypothetical (monoheme) protein           | kustd1710 |                                                            | Leptospira_interrogans_serovar_Copenhageni (lic:LIC10684:119/256 144-238 (33%)) |
| hypothetical (diheme) protein             | kustd1711 | Bacillus_firmus (M94110:342/316 171-224 (33%))             | Rhodopirellula_baltica (rba:RB4621:1497/316 124-316 (33%))                      |
| hypothetical quinol oxidase               | kustd1712 |                                                            | Staphylococcus_epidermidis_RP62A (ser:SERP0672:451/699 97-308 (27%))            |
| conserved hypothetical protein            | kustd1713 |                                                            | Pseudomonas_syringia (psb:Psyr_3943:224/252 110-245 (36%))                      |

### homologous to other known enzymes

| enzyme                    | orf       | corresponding gene with validated product                           | best blast hit in KEGG "genes" database                          |
|---------------------------|-----------|---------------------------------------------------------------------|------------------------------------------------------------------|
| hypothetical thioredoxin  | kustd2197 | Escherichia coli (b3781:127/108 1-108 (48%))                        | Photobacterium_profundum_SS9 (ppr:PBPRA3541:112/108 1-108 (55%)) |
| hypothetical thioredoxin  | kustc0967 | Bradyrhizobium_japonicum (Z23140:221/166 48-141 (30%))              | Geobacter_sulfurreducens (gsu:GSU3280:171/166 48-166 (39%))      |
| hypothetical thioredoxin  | kustc0860 | Bradyrhizobium_japonicum (Z23140:221/161 43-136 (31%))              | Geobacter_sulfurreducens (gsu:GSU3280:171/161 43-144 (48%))      |
| hypothetical thioredoxin  | kustc0978 | Escherichia coli (b3801:551/758 90-225 (25%))                       | Methanosarcina_barkeri (mba:Mbar_A0261:711/758 51-756 (57%))     |
| cytochrome c peroxidase   | kustd1904 | Pseudomonas_aeruginosa (PA4587:346/350 39-347 (45%))                | Pseudomonas_fluorescens (pfl:PFL_5183:330/350 34-347 (57%))      |
| cytochrome c peroxidase   | kuste2905 | Pseudomonas_aeruginosa (PA4587:346/358 47-355 (48%))                | Vibrio_parahaemolyticus (vpa:VP1718:344/358 45-356 (58%))        |
| hypothetical flavoprotein | kuste3160 | Methanothermobacter_thermautotrophicus (U17835:404/391 6-389 (37%)) | Methanococcus_jannaschii (mja:MJ0732:393/391 4-385 (46%))        |

### large hypothetical multiheme (catalytic?) cytochromes, multicopper and molybdopterin proteins

| enzyme                                                      | orf       | corresponding gene with validated product                   | best blast hit in KEGG "genes" database                                  |
|-------------------------------------------------------------|-----------|-------------------------------------------------------------|--------------------------------------------------------------------------|
| hypothetical (tetradecaheme) protein                        | kuste4025 | Nitrosomonas_europaea (U04053:570/338 41-337 (22%))         | Methylococcus_capsulatus_Bath (mca:MCA2189:600/338 26-337 (22%))         |
| hypothetical (undecaheme) protein                           | kuste2877 | Nitrosomonas_europaea (U04053:570/404 185-353 (25%))        | Geobacter_sulfurreducens (gsu:GSU2887:884/404 46-386 (25%))              |
| hypothetical (octaheme) protein                             | kuste4281 | Shewanella_frigidimarina (AJ132010:561/617 476-579 (37%))   | Rhodopirellula_baltica (rba:RB878:480/617 150-549 (24%))                 |
| hypothetical multicopper oxidase                            | kuste4301 | Bacillus_subtilis (U51115:511/425 94-285 (27%))             | Burkholderia_pseudomallei_K96243 (bps:BPSS0456:431/425 1-421 (59%))      |
| hypothetical siroheme/iron sulfur protein                   | kuste4564 | Archaeoglobus_fulgidus (M95624:366/296 13-295 (24%))        | Geobacter_sulfurreducens (gsu:GSU1351:322/296 10-273 (56%))              |
| hypothetical siroheme/iron sulfur protein                   | kustc1191 | Methanothermobacter_wolfei (AJ009688:349/308 118-235 (36%)) | Clostridium_tetani_E88 (ctc:CTC01213:295/308 90-308 (29%))               |
| hypothetical molybdopterin oxidoreductase with cytochrome b | kuste2658 | Thiobacillus sp. KCT001 (AJ314793:211/556 389-555 (24%))    | Mycobacterium_avium_paratuberculosis (mpa:MAP1497c:661/556 27-550 (42%)) |
| hypothetical molybdopterin oxidoreductase                   | kustc0484 | fdhA (Moorella_thermoacetica:AAB18330)                      |                                                                          |

|                                                                          |                                     |                                                                                                                                                                |                                                                                                                                                                                                            |
|--------------------------------------------------------------------------|-------------------------------------|----------------------------------------------------------------------------------------------------------------------------------------------------------------|------------------------------------------------------------------------------------------------------------------------------------------------------------------------------------------------------------|
| hypothetical molybdopterine oxidoreductase                               | kustc0546                           | fdhA (Moorella thermoacetica:AAB18330)                                                                                                                         | Archaeoglobus_fulgidus (AF1203; e-146)                                                                                                                                                                     |
| hypothetical molybdopterine oxidoreductase<br>(with associated proteins) | kustc0714<br>kustc0713<br>kustc0712 | Escherichia coli (b2285:166/152 17-149 (33%))<br>Ralstonia eutropha (AJ223295:520/594 16-519 (38%))<br>Moorella thermoacetica (AAB18329:707/693 104-575 (38%)) | Thermococcus_kodakaraensis_KOD1 (tko:TK1614:154/152 21-148 (57%))<br>Thermococcus_kodakaraensis_KOD1 (tko:TK1613:600/594 12-591 (61%))<br>Thermococcus_kodakaraensis_KOD1 (tko:TK1612:952/693 5-680 (39%)) |

### small electron carrier cytochromes

| protein                                    | orf       | corresponding gene with validated product                 | best blast hit in KEGG "genes" database                            |
|--------------------------------------------|-----------|-----------------------------------------------------------|--------------------------------------------------------------------|
| hypothetical (tetra heme) protein          | kuste2461 | Shewanella frigidimarina (AJ236923:588/476 306-473 (23%)) | Rhodopirellula_baltica (rba:RB6885:770/476 52-461 (26%))           |
| hypothetical (mono heme) protein           | kuste3440 | Bradyrhizobium japonicum (L07487:290/154 73-123 (26%))    | Geobacter_sulfurreducens (gsu:GSU2513:146/154 73-154 (34%))        |
| hypothetical (tri heme) protein            | kuste4356 |                                                           | Desulfotalea_psychrophila_LSV54 (dps:DP0200:157/566 91-389 (36%))  |
| hypothetical (mono heme) protein           | kustd1686 |                                                           | Clostridium_tetani_E88 (ctc:CTC01556:579/162 39-142 (28%))         |
| similar to cytochrome c553                 | kusta0044 | Gluconacetobacter europaeus (Y08696:444/120 36-115 (29%)) | Rhodopirellula_baltica (rba:RB12673:510/120 38-101 (33%))          |
| hypothetical (mono heme) protein           | kusta0085 |                                                           | Cryptococcus_neoformans_JEC21 (cne:CNK00010:1047/172 34-140 (26%)) |
| hypothetical (mono heme) protein           | kusta0088 |                                                           | Bradyrhizobium_japonicum (bja:blr2766:290/126 52-122 (33%))        |
| similar to cytochrome c like protein; ccpA | kustc1220 |                                                           | Desulfotalea_psychrophila_LSV54 (dps:DP0200:157/169 5-168 (35%))   |
| hypothetical (tetra heme) protein          | kustc1170 |                                                           | Geobacter_sulfurreducens (gsu:GSU2937:324/255 95-244 (22%))        |
| hypothetical (penta heme) protein          | kustc1045 |                                                           | Photobacterium_profundum_SS9 (ppr:PBPR1680:496/390 53-379 (25%))   |
| cytochrome c-552*                          | kustc0563 | Bradyrhizobium japonicum (L07487:290/115 35-110 (27%))    | Bordetella_pertussis (bpe:BP2172:312/115 24-111 (28%))             |
| similar to cytochrome c-553                | kustc0562 | Bradyrhizobium japonicum (L07487:290/121 36-117 (31%))    | Chromobacterium_violaceum (cvi:CV1171:309/121 34-121 (33%))        |
| hypothetical (di heme) protein             | kustc0559 |                                                           | Desulfotalea_psychrophila_LSV54 (dps:DP0507:292/291 1-282 (28%))   |

\* purified and characterized, one of the dominant cytochromes of *K. stuttgartiensis* (Cirpus et al. 2005)

### ferredoxins and iron sulfur proteins

| protein                          | orf       | corresponding gene with validated product                    | best blast hit in KEGG "genes" database                                 |
|----------------------------------|-----------|--------------------------------------------------------------|-------------------------------------------------------------------------|
| hypothetical ferredoxin          | kuste3290 | Pyrococcus_furiosus (X79502:67/61 5-61 (37%))                | Desulfotalea_psychrophila_LSV54 (dps:DP1865:63/61 1-59 (49%))           |
| hypothetical ferredoxin          | kuste3419 | Escherichia coli (b1109:434/357 64-107 (34%))                | Thermotoga_maritima (tma:TM0034:357/357 1-354 (44%))                    |
| hypothetical ferredoxin          | orf1474   | Methanothermobacter wolfeii (AJ009688:349/105 4-68 (27%))    | Archaeoglobus_fulgidus (afu:AF1669:150/105 1-104 (36%))                 |
| hypothetical ferredoxin          | kuste3675 | Methanothermobacter wolfeii (AJ009688:349/105 4-68 (27%))    | Archaeoglobus_fulgidus (afu:AF1669:150/105 1-104 (36%))                 |
| hypothetical ferredoxin          | kuste4015 | Thauera aromatica (AJ224959:81/56 1-53 (42%))                | Treponema_denticola_ATCC_35405 (tde:TDE1736:56/56 1-26 (65%))           |
| hypothetical ferredoxin          | kuste4141 | Escherichia coli (b4379:287/132 15-63 (40%))                 | Chlorobium_tepidum_TLS (cte:CT1701:292/132 3-101 (49%))                 |
| hypothetical iron sulfur protein | kuste4192 | Pseudomonas_aeruginosa (PA3805:252/505 359-491 (25%))        | Methanococcus_jannaschii (mja:MJ0749:246/505 58-249 (29%))              |
| hypothetical iron sulfur protein | kuste4657 | Rhodobacter_capsulatus (Y10142:431/446 133-313 (25%))        | Thermotoga_maritima (tma:TM0244:451/446 11-438 (43%))                   |
| hypothetical iron sulfur protein | kustd1272 | Methanosarcina_barkeri (Y13763:259/396 262-367 (29%))        | Methanosarcina_acetivorans (mac:MA1031:377/396 4-379 (40%))             |
| hypothetical ferredoxin          | kustd1690 | Methanothermobacter wolfeii (AJ009688:349/274 139-254 (25%)) | Bacteroides_fragilis_NCTC_9434 (bfs:BF2619:290/274 1-259 (48%))         |
| hypothetical ferredoxin          | kustd2018 | Pyrococcus_furiosus (X79502:67/62 2-62 (50%))                | Clostridium_perfringens (cpe:CPE2511:62/62 1-61 (58%))                  |
| hypothetical iron sulfur protein | kusta0002 | Escherichia coli (b2978:761/265 1-216 (25%))                 | Geobacter_sulfurreducens (gsu:GSU3297:421/265 7-264 (37%))              |
| hypothetical iron sulfur protein | kustc1224 | Escherichia coli (b2204:287/456 316-382 (32%))               | Geobacter_sulfurreducens (gsu:GSU0126:325/456 56-435 (32%))             |
| hypothetical ferredoxin          | kustc1054 | Methanothermobacter wolfeii (AJ009688:349/70 1-38 (37%))     | Thermoanaerobacter_tengcongensis (tte:TTE1605:69/70 3-67 (50%))         |
| hypothetical ferredoxin          | kustc0891 | Escherichia coli (b2205:231/202 17-200 (32%))                | Symbiobacterium_thermophilum_IAM14863 (sth:STH516:203/202 13-187 (42%)) |
| hypothetical ferredoxin          | kustc0775 | Salmonella_typhimurium (AJ224978:250/141 10-139 (30%))       | Archaeoglobus_fulgidus (afu:AF0950:157/141 11-141 (42%))                |
| hypothetical ferredoxin          | kustc0566 | Escherichia coli (b0895:205/58 2-53 (31%))                   | Sulfolobus_solfataricus (sso:SSO11071:94/58 3-58 (37%))                 |

1) abbreviations correspond to Figure 3

Blast hits are indicated for each gene. Genes were blasted against a database of proteins with experimentally validated functions ([www.cmbi.kun.nl/exprot](http://www.cmbi.kun.nl/exprot)) and against the KEGG genes database ([www.genome.jp](http://www.genome.jp)). The best Blast hits of each orf are summarized in the following notation: organism name (id of database entry: length of protein in the database/length of orf in Kuenenia stuttgartiensis start of Blast hit in K. stuttgartiensis - end of Blast hit in K. stuttgartiensis (percentage of amino acids identical)).
