# Supplementary material for: Deciphering the evolution and metabolism of an anammox bacterium from a community genome
Source: Springer Nature journal article supplement (doi:10.1038/nature04647), 2006-04-01
Supplement: 41586_2006_BFnature04647_MOESM10_ESM.pdf [file 41586_2006_BFnature04647_MOESM10_ESM.pdf]

**SOM Table 3 Iron and manganese respiration by the anammox bacterium *Kuenenia stuttgartiensis***

The presence of multiple divergent paralogues of respiratory complexes in the genome assembly of *K. stuttgartiensis* triggered the experimental investigation of manganese and iron respiration in this anammox bacterium.

Single cells of *K. stuttgartiensis* were incubated with different electron donors and acceptors [1]. Fe(II) or Mn(II) oxidation rates were measured with nitrate as electron acceptor and Mn(IV) and Fe(III) reduction rates were measured using freshly synthesized  $\delta$ -MnO<sub>2</sub> [2], amorphous iron oxyhydroxide (FeOOH; [3] or Fe(III) citrate in combination with formate as electron donor. The conversion rates were calculated based on Mn(II) and Fe(II) consumption or production in time [4,5]. Negative controls with heat-killed cells and without electron donor were performed. In addition, further negative controls were performed with *Escherichia coli* (a dissimilative nitrate reducer) and *Paracoccus denitrificans* (a denitrifier). As a positive control, the Mn(IV) and Fe(III) reduction rates of *Shewanella putrefaciens*, a known Mn(IV) and Fe(III) reducer [6], were measured.

| Organism                 | Mn (IV) reduction rate <sup>a</sup> | Fe (III) reduction rate <sup>b</sup> |            | Fe (II) oxidation rate <sup>b</sup> |
|--------------------------|-------------------------------------|--------------------------------------|------------|-------------------------------------|
|                          |                                     | FeOOH                                | Fe citrate |                                     |
| <i>K.stuttgartiensis</i> | 0.40                                | 0.2                                  | 0.9        | 4.8                                 |
| <i>S. putrefaciens</i>   | 1.21                                | 1.0                                  | 5.6        | ND                                  |
| <i>E. coli</i>           | 0.10                                | 0.05                                 | ND         | ND                                  |
| <i>P. denitrificans</i>  | 0.13                                | 0.04                                 | ND         | ND                                  |

**SOM Table 3.** Mn and Fe reduction rates and Fe oxidation rates of *K. stuttgartiensis*, *S. putrefaciens* (positive control), *E. coli* (negative control) and *P. denitrificans* (negative control). <sup>a</sup>nmol Mn(II) (mg protein)<sup>-1</sup> min<sup>-1</sup>, <sup>b</sup>nmol Fe(II) (mg protein)<sup>-1</sup> min<sup>-1</sup>. ND, not determined

The single cells of *K. stuttgartiensis* oxidized Fe(II) at a rate of 4.8 nmol Fe(II) (mg protein)<sup>-1</sup> min<sup>-1</sup> but not Mn(II) with nitrate as electron donor. The Mn(IV) and Fe(III) reduction rates obtained with *K. stuttgartiensis* single cells and formate as electron donor were significantly higher than the rates obtained for the negative controls with *E. coli*, *P. denitrificans* or heat-killed cells (**SOM Table 3**). *K. stuttgartiensis* did not convert Mn(IV) or Fe(III) with ammonium as electron donor, and *S. putrefaciens* was not able to oxidize ammonium with nitrite as electron acceptor. Under the conditions tested *K. stuttgartiensis* can oxidize ammonium anaerobically to N<sub>2</sub> with nitrite as electron donor, at a rate up to 25 nmol ammonium (mg protein)<sup>-1</sup> min<sup>-1</sup>.

**REFERENCES**

1. Strous M., Fuerst J.A., Kramer E.H.M., Logemann S., Muyzer G., Van de Pas-Schoonen K.T., Webb R., Kuenen J.G., Jetten M.S.M. (1999) Missing lithotroph identified as new planctomycete. *Nature* 400: 446-9.
2. Villalobos M., Toner B., Bargar J., Sposito G. (2003) Characterization of the manganese oxide produced by *Pseudomonas putida* strain MnB1. *Geochimica et Cosmochimica Acta* 67: 2649-2662.

3. Lovley, D.R., Phillips, E.J.P. (1986a). Organic matter mineralization with reduction of ferric iron in anaerobic sediments. *Applied and Environmental Microbiology* 51: 683-689.
4. Lovley, D.R., Phillips, E.J.P. (1986b). Availability of ferric iron for microbial reduction in bottom sediments of the freshwater tidal Potomac river. *Applied and Environmental Microbiology* 52: 751-757.
5. Lovley D.R. (1991) Dissimilatory Fe(III) and Mn(IV) reduction. *Microbiology Reviews* 55: 259-87.
6. Heidelberg J.F., Paulsen I.T., *et al.* (2002) Genome sequence of the dissimilatory metal ion-reducing bacterium *Shewanella oneidensis*. *Nature Biotechnology* 20(11): 1118-1123.
