# Supplementary material for: Deciphering the evolution and metabolism of an anammox bacterium from a community genome
Source: Springer Nature journal article supplement (doi:10.1038/nature04647), 2006-04-01
Supplement: 41586_2006_BFnature04647_MOESM11_ESM.pdf [file 41586_2006_BFnature04647_MOESM11_ESM.pdf]

SOM Table 4. Genes with known homologues involved in carbon metabolism

**accoa<sup>1</sup> acetyl-CoA pathway (CO<sub>2</sub> fixation)**

| enzyme                                                                                                        | orf       | corresponding gene with validated product                        | best blast hit in KEGG "genes" database                                          |
|---------------------------------------------------------------------------------------------------------------|-----------|------------------------------------------------------------------|----------------------------------------------------------------------------------|
| 5-methyltetrahydrofolate-corrinoid FeS protein methyltransferase                                              | kustd1538 | <i>Clostridium tetani</i> (CTC01806:791/261 4-259 (30%))         | <i>Thermoanaerobacter tengcongensis</i> (tte:TTE1803:803/261 4-259 (31%))        |
| small subunit corrinoid iron-sulfur protein                                                                   | kustd1539 | <i>Moorella thermoacetica</i> (L07100:323/318 1-317 (51%))       | <i>Dehalococcoides ethenogenes</i> _195 (det:DET0701:313/318 2-317 (42%))        |
| carbon monoxide dehydrogenase/acetyl CoA synthetase, nickel insertion protein                                 | kustd1540 | <i>Methanosarcina acetivorans</i> (MA1013:232/256 22-244 (33%))  | <i>Methanococcus maripaludis</i> _S2 (mmp:MMP0982:250/256 5-238 (42%))           |
| Conserved hypothetical FeS protein                                                                            | kustd1541 | <i>Desulfovibrio vulgaris</i> (DVU0908:543/644 214-626 (25%))    | <i>Dehalococcoides ethenogenes</i> _195 (det:DET0704:640/644 1-635 (36%))        |
| large subunit corrinoid/iron-sulfur protein                                                                   | kustd1542 | <i>Moorella thermoacetica</i> (L07099:446/446 1-441 (46%))       | <i>Dehalococcoides ethenogenes</i> _195 (det:DET0699:448/446 1-441 (43%))        |
| carbon monoxide dehydrogenase/acetyl CoA synthetase, alpha subunit                                            | kustd1545 | <i>Methanosarcina mazei</i> (MM0686:469/727 318-722 (40%))       | <i>Dehalococcoides ethenogenes</i> _195 (det:DET0700:733/727 1-726 (50%))        |
| carbon monoxide dehydrogenase/acetyl CoA synthetase, beta subunit                                             | kustd1546 | <i>Methanosarcina mazei</i> (MM0121:628/653 10-627 (46%))        | <i>Methanosarcina mazei</i> (mma:MM0121:628/653 10-627 (48%))                    |
| carbon monoxide dehydrogenase/acetyl CoA synthetase, nickel insertion protein                                 | kustd1547 | <i>Methanosarcina acetivorans</i> (MA1013:232/257 20-250 (30%))  | <i>Methanobacterium thermoautotrophicum</i> (mth:MTH1120:273/257 1-229 (51%))    |
| large subunit corrinoid/iron-sulfur protein                                                                   | kuste3001 | <i>Moorella thermoacetica</i> (L07099:446/257 2-43 (52%))        | <i>Dehalococcoides CBDB1</i> (deh:cbdb_A651:448/257 2-68 (42%))                  |
| carbon monoxide dehydrogenase/acetyl CoA synthetase, beta subunit                                             | kuste4610 | <i>Methanosarcina mazei</i> (MM0121:628/658 7-658 (37%))         | <i>Thermoanaerobacter tengcongensis</i> (tte:TTE1708:642/658 14-658 (41%))       |
| formate dehydrogenase / nuoG-like                                                                             | kustd1550 | <i>Moorella thermoacetica</i> (AAB18330:893/896 1-887 (47%))     | <i>Enterococcus faecalis</i> _V583 (efa:EF1390:906/896 3-894 (46%))              |
| formate dehydrogenase / nuoF-like                                                                             | kustd1551 | <i>Ralstonia eutropha</i> (AJ223295:520/552 40-550 (40%))        | <i>Thermoanaerobacter tengcongensis</i> (tte:TTE0893:596/552 31-549 (60%))       |
|                                                                                                               | kustd1552 | <i>Escherichia coli</i> (b2285:166/162 27-144 (38%))             | <i>Thermococcus kodakaraensis_KOD1</i> (tko:TK1614:154/162 31-160 (49%))         |
| formate dehydrogenase, alpha subunit                                                                          | kuste2423 | <i>Moorella thermoacetica</i> (AAB18330:893/896 1-887 (48%))     | <i>Enterococcus faecalis</i> _V583 (efa:EF1390:906/896 3-894 (46%))              |
| formate dehydrogenase, cytochrome b556                                                                        | kuste2856 | <i>Escherichia coli</i> (b3892:211/295 15-208 (21%))             | <i>Desulfotalea psychrophila</i> _LSv54 (dps:DP1985:567/295 16-290 (35%))        |
| formate:quinone oxidoreductase (complex 1)                                                                    | kustc0838 | <i>Escherichia coli</i> (b2278:613/642 2-636 (38%))              | <i>Geobacter sulfurreducens</i> (gsu:GSU0349:666/642 1-634 (57%))                |
|                                                                                                               | kustc0837 | <i>Escherichia coli</i> (b2279:100/100 1-99 (38%))               | <i>Geobacter sulfurreducens</i> (gsu:GSU0348:100/100 1-99 (63%))                 |
|                                                                                                               | kustc0836 | <i>Escherichia coli</i> (b2280:184/169 4-169 (26%))              | <i>Geobacter sulfurreducens</i> (gsu:GSU0347:167/169 1-168 (42%))                |
|                                                                                                               | kustc0835 | <i>Escherichia coli</i> (b2281:180/139 24-133 (46%))             | <i>Geobacter sulfurreducens</i> (gsu:GSU0346:132/139 1-132 (48%))                |
|                                                                                                               | kustc0834 | <i>Salmonella typhimurium</i> (L42521:325/332 6-328 (47%))       | <i>Geobacter sulfurreducens</i> (gsu:GSU0345:348/332 6-330 (56%))                |
|                                                                                                               | kustc0833 | no validated blast hit                                           | <i>Methanosarcina acetivorans</i> (mac:MA4664:41/95 1-37 (51%))                  |
|                                                                                                               | kustc0828 | <i>Moorella thermoacetica</i> (AAB18330:893/890 3-874 (35%))     | <i>Desulfotalea psychrophila</i> _LSv54 (dps:DP0682:887/890 1-874 (32%))         |
|                                                                                                               | kustc0827 | <i>Ralstonia eutropha</i> (AJ223295:520/616 21-543 (38%))        | <i>Thermococcus kodakaraensis_KOD1</i> (tko:TK1613:600/616 21-616 (57%))         |
|                                                                                                               | kustc0826 | <i>Escherichia coli</i> (b2285:166/164 6-163 (34%))              | <i>Geobacter sulfurreducens</i> (gsu:GSU0342:173/164 4-161 (47%))                |
|                                                                                                               | kustc0825 | <i>Paracoccus denitrificans</i> (M93015:412/396 1-396 (45%))     | <i>Geobacter sulfurreducens</i> (gsu:GSU0341:390/396 9-396 (60%))                |
|                                                                                                               | kustc0824 | <i>Escherichia coli</i> (b2286:600/166 3-148 (39%))              | <i>Sinorhizobium meliloti</i> (sme:SMa1531:182/166 7-151 (46%))                  |
|                                                                                                               | kustc0823 | <i>Escherichia coli</i> (b2287:220/167 15-164 (57%))             | <i>Geobacter sulfurreducens</i> (gsu:GSU0339:170/167 13-164 (67%))               |
|                                                                                                               | kustc0822 | <i>Escherichia coli</i> (b2288:147/117 9-116 (37%))              | <i>Geobacter sulfurreducens</i> (gsu:GSU0338:118/117 4-117 (62%))                |
| formate dehydrogenase, alpha subunit                                                                          | kustc0484 | <i>Moorella thermoacetica</i> (AAB18330:893/769 74-757 (34%))    | <i>Symbiobacterium thermophilum</i> _IAM14863 (sth:STH2056:734/769 69-765 (39%)) |
| formate dehydrogenase, alpha subunit                                                                          | kustc0546 | <i>Moorella thermoacetica</i> (AAB18330:893/733 35-706 (29%))    | <i>Archaeoglobus fulgidus</i> (afu:AF1203:741/733 34-728 (40%))                  |
| formate dehydrogenase, beta subunit                                                                           | kuste4570 | <i>Moorella thermoacetica</i> (AAB18329:707/581 26-495 (41%))    | <i>Thermococcus kodakaraensis_KOD1</i> (tko:TK1612:952/581 26-556 (42%))         |
| formyltetrahydrofolate synthetase                                                                             | kustb0169 | <i>Clostridium cylindrosporium</i> (L12465:556/587 10-586 (44%)) | <i>Desulfotalea psychrophila</i> _LSv54 (dps:DP2227:557/587 31-587 (73%))        |
| methyltetrahydrofolate cyclohydrolase                                                                         | kuste4247 | <i>Methylobacterium capsulatus</i> (MCA0507:207/215 2-200 (22%)) | <i>Treponema denticola</i> _ATCC_35405 (tde:TDE0046:213/215 1-208 (34%))         |
| bifunctional 5,10-methylene-tetrahydrofolate dehydrogenase and 5,10-methylene-tetrahydrofolate cyclohydrolase | kuste2296 | <i>Escherichia coli</i> (b0529:288/303 1-295 (47%))              | <i>Desulfotalea psychrophila</i> _LSv54 (dps:DP1901:313/303 1-295 (73%))         |
| methylenetetrahydrofolate reductase                                                                           | kustc0552 | <i>Methanosarcina mazei</i> (MM0438:292/313 10-307 (40%))        | <i>Sinorhizobium meliloti</i> (sme:SMc04340:363/313 7-307 (45%))                 |

**tca<sup>1</sup> tricarboxylic acid cycle\***

| enzyme                                  | orf       | corresponding gene with validated product                       | best blast hit in KEGG "genes" database                                              |
|-----------------------------------------|-----------|-----------------------------------------------------------------|--------------------------------------------------------------------------------------|
| pyruvate carboxylase                    | kustd1409 | <i>Methanosarcina acetivorans</i> (MA0675:493/1149 6-456 (45%)) | <i>Rhodopirellula baltica</i> (rba:RB10592:1166/1149 3-1147 (56%))                   |
| oxaloacetate decarboxylase              | kustd2060 | <i>Methanosarcina acetivorans</i> (MA0674:572/610 9-609 (28%))  | <i>Campylobacter jejuni</i> (cjc:Cj0933c:599/610 6-607 (55%))                        |
| phosphoenolpyruvate carboxykinase       | kuste4342 | <i>Sinorhizobium meliloti</i> (U15199:536/516 106-469 (25%))    | <i>Aeropyrum pernix</i> (ape:APE0033:493/516 1-506 (31%))                            |
| citrate synthase                        |           |                                                                 |                                                                                      |
| citrate lyase                           |           |                                                                 |                                                                                      |
| aconitate hydratase                     | kuste2878 | <i>Escherichia coli</i> (b1276:891/641 13-605 (26%))            | <i>Gloeobacter violaceus</i> (gvi:glr4087:645/641 4-635 (64%))                       |
| isocitrate dehydrogenase                | kuste3602 | <i>Escherichia coli</i> (b1136:416/423 20-422 (61%))            | <i>Symbiobacterium thermophilum</i> _IAM14863 (sth:STH2544:421/423 14-422 (63%))     |
|                                         | kusta0017 | <i>Leptospira borgpetersenii</i> (M59431:358/380 3-367 (56%))   | <i>Leptospira interrogans serovar Copenhageni</i> (lic:LIC11768:358/380 3-367 (56%)) |
| 2-oxoacid dehydrogenase                 | kuste2314 | <i>Clostridium magnum</i> (L31844:326/325 1-319 (35%))          | <i>Thermoanaerobacter tengcongensis</i> (tte:TTE0186:333/325 1-323 (44%))            |
|                                         | kuste2317 | <i>Clostridium magnum</i> (L31844:333/344 21-338 (47%))         | <i>Oceanobacillus iheyensis</i> (oih:OB1865:327/344 21-344 (55%))                    |
|                                         | kuste2318 | <i>Escherichia coli</i> (b0727:405/416 2-394 (35%))             | <i>Bacillus halodurans</i> (bha:BH2761:426/416 1-394 (41%))                          |
|                                         | kuste3610 | <i>Zymomonas mobilis</i> (X82291:466/474 8-460 (40%))           | <i>Bacillus thuringiensis konkukian</i> (btk:BT9727_3906:473/474 8-469 (43%))        |
| 2-oxoacid - ferredoxin oxidoreductase** | kustc0357 | <i>Desulfovibrio vulgaris</i> (DVU1569:577/363 2-328 (27%))     | <i>Thermoanaerobacter tengcongensis</i> (tte:TTE198:355/363 2-346 (60%))             |
|                                         | kustc0358 | <i>Chlorobium tepidum</i> (CT0162:342/245 18-216 (30%))         | <i>Geobacter sulfurreducens</i> (gsu:GSU1860:247/245 1-243 (56%))                    |
|                                         | kustc0356 |                                                                 | <i>Geobacter sulfurreducens</i> (gsu:GSU1862:67/67 1-66 (43%))                       |
| succinyl-CoA synthetase                 | kustc0453 | <i>Escherichia coli</i> (b0729:289/293 1-289 (58%))             | <i>Bacillus thuringiensis konkukian</i> (btk:BT9727_3576:300/293 1-292 (65%))        |
|                                         | kustc0452 | <i>Escherichia coli</i> (b0728:388/390 1-386 (46%))             | <i>Geobacillus kaustophilus_HTA426</i> (gka:GK1208:386/390 1-381 (53%))              |
| succinate dehydrogenase (complex2)      | kustc0681 | <i>Thermoplasma acidophilum</i> (X70908:137/126 19-95 (31%))    | <i>Symbiobacterium thermophilum</i> _IAM14863 (sth:STH2637:140/126 22-126 (33%))     |
|                                         | kustc0682 | <i>Escherichia coli</i> (b0722:115/124 7-113 (23%))             | <i>Archaeoglobus fulgidus</i> (afu:AF0684:117/124 9-111 (31%))                       |
|                                         | kustc0680 | <i>Escherichia coli</i> (b0723:588/580 36-580 (42%))            | <i>Symbiobacterium thermophilum</i> _IAM14863 (sth:STH2639:573/580 9-580 (56%))      |
|                                         | kustc0278 | <i>Escherichia coli</i> (b0724:238/240 6-235 (42%))             | <i>Symbiobacterium thermophilum</i> _IAM14863 (sth:STH2640:243/240 10-238 (48%))     |
| fumarate hydratase                      | kustd2184 | <i>Escherichia coli</i> (b4139:493/464 8-463 (47%))             | <i>Geobacter sulfurreducens</i> (gsu:GSU0479:463/464 7-464 (55%))                    |
| malate dehydrogenase                    | kuste2399 | <i>Lactobacillus sakei</i> (AF054624:325/313 4-306 (32%))       | <i>Chlorobium tepidum</i> _TLS (cte:CT1507:310/313 5-312 (59%))                      |

\* the glyoxylate shunt was completely absent  
 \*\* catalyses (de)carboxylation in both directions

**pfor<sup>1</sup> pyruvate::ferredoxin oxidoreductase and related activities**

| enzyme                                         | orf       | corresponding gene with validated product                        | best blast hit in KEGG "genes" database                             |
|------------------------------------------------|-----------|------------------------------------------------------------------|---------------------------------------------------------------------|
| pyruvate (2-oxoacid) ferredoxin oxidoreductase | kuste2339 | Desulfovibrio vulgaris (DVU1569:577/570 6-566 (40%))             | Methanosarcina_mazei (mma:MM0420:579/570 4-566 (50%))               |
| pyruvate (2-oxoacid) ferredoxin oxidoreductase | kuste2338 | Desulfovibrio vulgaris (DVU1570:284/287 12-282 (50%))            | Methanosarcina_barkeri (mba:Mbar_A2215:283/287 14-278 (59%))        |
| pyruvate (2-oxoacid) ferredoxin oxidoreductase | kustc1110 | Hydrogenobacter thermophilus (AB054643:389/305 4-79 (25%))       | Desulfotalea_psychrophila_LSV54 (dps:DP1200:409/305 1-301 (52%))    |
| pyruvate (2-oxoacid) ferredoxin oxidoreductase | kustc1109 | Hydrogenobacter thermophilus (AB054643:288/218 21-216 (30%))     | Desulfotalea_psychrophila_LSV54 (dps:DP1201:308/218 5-216 (57%))    |
| pyruvate (2-oxoacid) ferredoxin oxidoreductase | kuste4370 | Hydrogenobacter thermophilus (AB054643:288/1192 1005-1110 (33%)) | Desulfotalea_psychrophila_LSV54 (dps:DP2886:1180/1192 1-1188 (62%)) |

**acs<sup>1</sup> acetyl CoA synthetase and related activities**

| enzyme                                         | orf       | corresponding gene with validated product          | best blast hit in KEGG "genes" database                                |
|------------------------------------------------|-----------|----------------------------------------------------|------------------------------------------------------------------------|
| acetyl-CoA synthetase                          | kustc1128 | Bacillus subtilis (L17309:572/589 28-589 (58%))    | Geobacillus_kaustophilus_HTA426 (gka:GK2806:571/589 27-589 (60%))      |
| long chain acyl coa synthetase                 | kustb0215 | Escherichia coli (b0037:522/528 47-523 (30%))      | Thermoanaerobacter_tengcongensis (tte:TTE1960:495/528 50-523 (36%))    |
| acetate CoA ligase (ADP forming)               | kuste3169 | Nostoc sp. PCC 6720 (Z48005:262/706 630-698 (33%)) | Archaeoglobus_fulgidus (afu:AF1211:685/706 4-685 (43%))                |
| phosphotransacetylase (truncated)              | kuste3170 | Escherichia coli (b0778:225/356 5-142 (22%))       | Desulfovibrio_vulgaris_Hildenborough (dvv:DVU1438:354/356 4-354 (35%)) |
| acetate CoA ligase (ADP forming) alpha subunit | kustc0502 | Escherichia coli (b0729:289/462 62-222 (23%))      | Methanosarcina_mazei (mma:MM0358:468/462 7-453 (45%))                  |
| acetate CoA ligase (ADP forming) beta subunit  | kusta0048 | Nostoc sp. PCC 6720 (Z48005:262/242 173-238 (28%)) | Thermococcus_kodakaraensis_KOD1 (tko:TK0465:232/242 12-238 (47%))      |

**gly<sup>1</sup> glycolysis/gluconeogenesis and related activities**

| enzyme                                   | orf       | corresponding gene with validated product               | best blast hit in KEGG "genes" database (e-value)                      |
|------------------------------------------|-----------|---------------------------------------------------------|------------------------------------------------------------------------|
| pyruvate kinase                          | kuste4167 | Escherichia coli (b1676:470/472 5-472 (41%))            | Synechocystis_sp_PCC6803 (syn:sl1275:591/472 5-471 (50%))              |
| phosphoenolpyruvate synthase             | kuste3000 | Escherichia coli (b2416:575/922 646-574 (23%))          | Rhodopseudomonas_palustris_CGA009 (rpa:RPA1051:913/922 2-918 (55%))    |
| enolase                                  | kustd1490 | Enterococcus faecalis (AJ401152:432/430 1-421 (64%))    | Geobacter_sulfurreducens (gsu:GSU2286:428/430 4-422 (68%))             |
| phosphoglycerate mutase                  | kuste4326 | Escherichia coli (b0755:250/231 3-228 (62%))            | Thermoanaerobacter_tengcongensis (tte:TTE2487:249/231 1-228 (71%))     |
| phosphoglycerate kinase                  | kustd1645 | Xanthobacter flavus (U08462:397/397 14-392 (44%))       | Geobacter_sulfurreducens (gsu:GSU1628:654/397 11-387 (60%))            |
| glyceraldehyde-3-phosphate dehydrogenase | kustd1643 | Streptomyces aureofaciens (U21191:332/333 20-331 (50%)) | Chlorobium_tepidum_TLS (cte:CT1480:334/333 3-332 (63%))                |
| triosephosphate isomerase                | kuste4253 | Lactococcus lactis (U07640:252/261 8-255 (42%))         | Thermotoga_maritima (tma:TM0689:654/261 8-259 (49%))                   |
| fructose-bisphosphate aldolase           | kustd1479 | Escherichia coli (b2096:286/462 239-358 (23%))          | Geobacter_sulfurreducens (gsu:GSU1245:364/462 118-383 (25%))           |
| 6-phosphofructokinase                    | kustc0560 | Escherichia coli (b3916:320/367 5-331 (37%))            | Geobacter_sulfurreducens (gsu:GSU1703:363/367 6-366 (53%))             |
| fructose-1,6-bisphosphatase              | kustd1478 | Escherichia coli (b4232:332/338 8-336 (50%))            | Desulfovibrio_vulgaris_Hildenborough (dvv:DVU1841:337/338 7-332 (58%)) |
| glucosephosphate isomerase               | kuste2903 | Escherichia coli (b4025:549/549 2-549 (69%))            | Vibrio_vulnificus_CMCP6 (vvu:VV11396:550/549 1-549 (71%))              |
| phosphoglycerate mutase                  | kuste4326 | Escherichia coli (b0755:250/231 3-228 (62%))            | Thermoanaerobacter_tengcongensis (tte:TTE2487:249/231 1-228 (71%))     |
| glucokinase                              | kuste3751 | Bacillus megaterium (AJ000005:324/322 6-311 (30%))      | Thermoanaerobacter_tengcongensis (tte:TTE0090:315/322 6-315 (40%))     |

1) abbreviations correspond to Figure 3  
 Blast hits are indicated for each gene. Genes were blasted against a database of proteins with experimentally validated functions (www.cmbi.kun.nl/exprot) and against the KEGG genes database (www.genome.jp). The best Blast hits of each orf are summarized in the following notation: organism name (id of database entry: length of protein in the database/length of orf in Kuenenia stuttgartiensis start of Blast hit in K. stuttgartiensis - end of Blast hit in K. stuttgartiensis (percentage of amino acids identical)).
