# Supplementary material for: Deciphering the evolution and metabolism of an anammox bacterium from a community genome
Source: Springer Nature journal article supplement (doi:10.1038/nature04647), 2006-04-01
Supplement: 41586_2006_BFnature04647_MOESM13_ESM.pdf [file 41586_2006_BFnature04647_MOESM13_ESM.pdf]

**SOM Table 6. Proteins (gene names) used for phylogenetic analysis**

| <b>Proteins</b>                     | <b>ORF Code</b> |
|-------------------------------------|-----------------|
| ribosomal protein L1 (rpl1)         | kuste2954       |
| ribosomal protein L2 (rpl2)         | kuste2967       |
| ribosomal protein L3 (rpl3)         | kuste2964       |
| ribosomal protein L4 (rpl4)         | kuste2965       |
| ribosomal protein L5 (rpl5)         | kuste2976       |
| ribosomal protein L6 (rpl6)         | kuste2979       |
| ribosomal protein L7/L12 (rpl7/12)  | kuste2956       |
| ribosomal protein L9 (rpl9)         | kusta0031       |
| ribosomal protein L10 (rpl10)       | kuste2955       |
| ribosomal protein L11 (rpl11)       | kuste2953       |
| ribosomal protein L13 (rpl13)       | kusta0077       |
| ribosomal protein L14 (rpl14)       | kuste2974       |
| ribosomal protein L15 (rpl15)       | kuste2982       |
| ribosomal protein L16 (rpl16)       | kuste2971       |
| ribosomal protein L17 (rpl17)       | kuste2992       |
| ribosomal protein L18 (rpl18)       | kuste2980       |
| ribosomal protein L19 (rpl19)       | kuste3320       |
| ribosomal protein L20 (rpl20)       | kuste3972       |
| ribosomal protein L21 (rpl21)       | kustd2165       |
| ribosomal protein L22 (rpl22)       | kuste2969       |
| ribosomal protein L23 (rpl23)       | kuste2966       |
| ribosomal protein L24 (rpl24)       | kuste2975       |
| ribosomal protein L27 (rpl27)       | kustd2166       |
| ribosomal protein L28 (rpl28)       | kuste3127       |
| ribosomal protein L29 (rpl29)       | kuste2972       |
| ribosomal protein L35 (rpl35)       | kuste3971       |
| ribosomal protein S2 (rps2)         | kuste3466       |
| ribosomal protein S3 (rps3)         | kuste2970       |
| ribosomal protein S4 (rps4)         | kuste2990       |
| ribosomal protein S5 (rps5)         | kuste2981       |
| ribosomal protein S6 (rps6)         | kusta0028       |
| ribosomal protein S7 (rps7)         | kuste2960       |
| ribosomal protein S8 (rps8)         | kuste2978       |
| ribosomal protein S9 (rps9)         | kusta0076       |
| ribosomal protein S10 (rps10)       | kuste2963       |
| ribosomal protein S11 (rps11)       | kuste2989       |
| ribosomal protein S12 (rps12)       | kuste2959       |
| ribosomal protein S13 (rps13)       | kuste2987       |
| ribosomal protein S15 (rps15)       | kustc0534       |
| ribosomal protein S16 (rps16)       | kuste3318       |
| ribosomal protein S17 (rps17)       | kuste2973       |
| ribosomal protein S18 (rps18)       | kusta0030       |
| ribosomal protein S19 (rps19)       | kuste2968       |
| ribosomal protein S20 (rps20)       | kustd1559       |
| RNA polymerase alpha subunit (rpoA) | kuste2991       |
| RNA polymerase beta subunit (rpoB)  | kuste2957       |
| RNA polymerase beta' subunit (rpoC) | kuste2958       |

|                               |           |
|-------------------------------|-----------|
| DNA gyrase subunit B (gyrB)   | kustc0439 |
| recombinase A (recA)          | kustd1394 |
| elongation factor Tu (EF-Tu)* | kuste2962 |

---

### **Genes**

5S ribosomal RNA gene  
16S ribosomal RNA gene  
23S ribosomal RNA gene

---

\* excluded from concatenated datasets because the *K. stuttgartiensis* EF-Tu clustered - independent of the treeing method applied - with *Chlorobium tepidum* suggesting that it was acquired by *K. stuttgartiensis* via lateral gene transfer. In addition, ribosomal proteins L31, L33, L36, and S14 were not included because they have been previously shown to be subject to lateral gene transfer events.
