# Supplementary material for: Deciphering the evolution and metabolism of an anammox bacterium from a community genome
Source: Springer Nature journal article supplement (doi:10.1038/nature04647), 2006-04-01
Supplement: 41586_2006_BFnature04647_MOESM15_ESM.pdf [file 41586_2006_BFnature04647_MOESM15_ESM.pdf]

SOM Table 8. Genes with homologues involved in peptidoglycan biosynthesis and cell division

| cell division/cell wall proteins | enzyme                                                                                                     | orf       | hit start <sup>3</sup>                            | e-value                                                                |
|----------------------------------|------------------------------------------------------------------------------------------------------------|-----------|---------------------------------------------------|------------------------------------------------------------------------|
|                                  | D-alanine-D-alanine ligase (ddlA)                                                                          | kuste2386 | Escherichia coli (b0092:306/334 3-320 (40%))      | Geobacter_sulfurreducens (gsu:GSU3066:316/334 1-323 (42%))             |
|                                  | alanine racemase 1, PLP-binding, biosynthetic                                                              | kuste2410 | Escherichia coli (b4053:359/374 9-371 (33%))      | Thermoanaerobacter_tengcongensis (tte:TTE2168:388/374 3-370 (42%))     |
|                                  | L-glutamine:D-fructose-6-phosphate aminotransferase (glmS)                                                 | kustd1383 | Thermus thermophilus (U17352:604/608 1-608 (49%)) | Chlorobium_tepidum_TLS (cte:CT0130:614/608 1-608 (57%))                |
|                                  | bifunctional multimodular glmU: N-acetyl glucosamine-1-phosphate uridylyltransferase (glmU)                | kusta0024 | Escherichia coli (b3730:456/323 4-311 (32%))      | Clostridium_perfringens (cpe:CPE2490:454/323 6-315 (40%))              |
|                                  | L-glutamine:D-fructose-6-phosphate aminotransferase (glmS)                                                 | kuste3187 | Thermus thermophilus (U17352:604/608 1-608 (49%)) | Chlorobium_tepidum_TLS (cte:CT0130:614/608 1-608 (57%))                |
|                                  | phosphoglucosamine mutase (mrsA,glmM)                                                                      | kustc0508 | Escherichia coli (b0688:546/541 34-541 (27%))     | Desulfotalea_psychrophila_LV54 (dps:DP2231:581/541 30-535 (42%))       |
|                                  | UDP-N-acetylglucosamine 1-carboxyvinyltransferase                                                          | kuste3313 | Escherichia coli (b3189:419/431 8-429 (43%))      | Geobacter_sulfurreducens (gsu:GSU3102:417/431 8-431 (53%))             |
|                                  | UDP-N-acetyl(enol)pyruvoylglucosamine reductase (FAD-binding)                                              | kuste3330 | Escherichia coli (b3972:342/300 11-298 (24%))     | Thermoanaerobacter_tengcongensis (tte:TTE1836:302/300 2-299 (39%))     |
|                                  | L-alanine adding enzyme, UDP-N-acetyl-muramate:alanine ligase (murC)                                       | kustc0684 | Escherichia coli (b0091:491/471 15-448 (31%))     | Geobacter_sulfurreducens (gsu:GSU3068:462/471 17-448 (35%))            |
|                                  | UDP-N-acetylmuramoylalanine-D-glutamate ligase                                                             | kuste3480 | Escherichia coli (b0088:438/476 80-476 (27%))     | Clostridium_tetani_E88 (ctc:CTC00213:464/476 9-476 (39%))              |
|                                  | glutamate racemase                                                                                         | kustd1506 | Bacillus subtilis (Z75208:272/266 3-198 (31%))    | Clostridium_tetani_E88 (ctc:CTC00259:266/266 1-259 (31%))              |
|                                  | cell division protein mraZ                                                                                 | kuste2373 | Escherichia coli (b0081:152/146 1-126 (33%))      | Staphylococcus_saprophyticus (ssp:SSP1593:143/146 1-144 (50%))         |
|                                  | S-adenosyl-dependent methyl transferase mraW                                                               | kuste2374 | Escherichia coli (b0082:313/299 6-298 (38%))      | Aquifex_aeolicus (aae:aq_1875:294/299 8-299 (47%))                     |
|                                  | division specific transpeptidase, penicillin-binding protein 3                                             | kuste2376 | Bacillus subtilis (Z25865:645/571 19-565 (33%))   | Geobacter_sulfurreducens (gsu:GSU3075:657/571 14-563 (41%))            |
|                                  | UDP-N-acetylmuramoylalanine-D-glutamate 2,6-diaminopimelate ligase (murE)                                  | kuste2378 | Escherichia coli (b0085:495/489 26-481 (36%))     | Thermoanaerobacter_tengcongensis (tte:TTE1649:492/489 23-482 (45%))    |
|                                  | D-alanine:D-alanine-adding enzyme                                                                          | kuste2379 | Escherichia coli (b0086:452/484 3-474 (30%))      | Desulfotalea_psychrophila_LV54 (dps:DP2901:1014/484 9-318 (25%))       |
|                                  | phospho-N-acetylmuramoyl-pentapeptide transferase                                                          | kuste2380 | Escherichia coli (b0087:360/358 24-350 (41%))     | Pasteurella_multocida (pmu:PM0139:360/358 12-358 (46%))                |
|                                  | cell division protein ftsW, stabilizes FtsZ ring, cytoplasmic membrane required for PBP2 expression        | kuste2381 | Escherichia coli (b0089:414/399 93-329 (32%))     | Bacillus_thuringiensis_konkukian (btk:BT9727_3653:363/399 7-358 (44%)) |
|                                  | UDP-N-acetylglucosamine:N-acetylmuramyl-pyrophosphoryl-undecaprenol N-acetylglucosamine transferase (murG) | kuste2383 | Escherichia coli (b0090:355/374 32-361 (24%))     | Thermoanaerobacter_tengcongensis (tte:TTE1645:364/374 1-361 (36%))     |
|                                  | L-alanine adding enzyme, UDP-N-acetyl-muramate:alanine ligase (murC)                                       | kuste2385 | Escherichia coli (b0091:491/500 23-475 (33%))     | Thermoanaerobacter_tengcongensis (tte:TTE2575:460/500 26-475 (43%))    |
|                                  | membrane-bound lytic murein transglycosylase A                                                             | kusta0010 | Escherichia coli (U32224:365/381 125-378 (33%))   | Thermosynechococcus_elongatus (tel:tlr0969:390/381 59-381 (41%))       |
|                                  | rod shape determining protein rodA                                                                         | kustd1894 | Escherichia coli (b0634:370/363 89-358 (38%))     | Geobacter_sulfurreducens (gsu:GSU2078:366/363 9-355 (40%))             |
|                                  | penicillin binding protein mrdA                                                                            | kustd1895 | Escherichia coli (b0635:633/642 24-621 (26%))     | Geobacter_sulfurreducens (gsu:GSU2079:639/642 7-631 (29%))             |
|                                  | rod shape-determining protein mreD                                                                         | kustd1896 | Escherichia coli (b3249:162/165 2-155 (21%))      | Thermoanaerobacter_tengcongensis (tte:TTE0900:172/165 1-148 (22%))     |
|                                  | rod shape-determining protein                                                                              | kustd1897 | Escherichia coli (b3250:367/288 186-286 (28%))    | Vibrio_parahaemolyticus (vpa:VP2690:298/288 33-286 (27%))              |
|                                  | rod shape-determining protein                                                                              | kustd1898 | Escherichia coli (b3251:367/351 9-348 (51%))      | Geobacter_sulfurreducens (gsu:GSU2089:347/351 5-343 (59%))             |
|                                  | murein lipoprotein, links outer and inner membranes                                                        | no hit    |                                                   |                                                                        |
|                                  | penicillin binding protein I                                                                               | no hit    |                                                   |                                                                        |

2) length of validated gene/length of orf in K. stuttgartiensis

3) start and ends refer to positions in the orf of K. stuttgartiensis

Blast hits are indicated for each gene. Genes were blasted against a database of proteins with experimentally validated functions ([www.cmbi.kun.nl/exprot](http://www.cmbi.kun.nl/exprot))

and against the KEGG genes database ([www.genome.jp](http://www.genome.jp)). The best Blast hits of each orf are summarized in the following notation: organism name

(id of database entry: length of protein in the dababase/length of orf in Kuenenia stuttgartiensis start of Blast hit in K. stuttgartiensis - end of Blast hit

in K. stuttgartiensis (percentage of amino acids identical)).
